# Supplementary material
Source: publisher site journal article supplement (https://www.dovepress.com/article/330300)
Supplement: Supplementary file 1 [file get_supplementary_file.php]

**Supplementary Figure 1** Associations between dietary nutrients and depression among the study population by BKMR model. The model is based on age, gender, education level, body mass index, employment status, smoking status, drinking status, daily energy intake, hypertension and diabetes, and other nutrients. (A) Cumulative effects of dietary nutrients (estimated value and 95% confidence interval). Compared with other nutrients in the 50th percentile, the nutrients are in a specific percentile (X-axis). (B) The single-nutrient effect (estimates and 95% credible intervals). (C) The univariate nutrient response function of each dietary nutrient has a 95% confidence band, and the other nutrients are fixed at the median. (D) Bivariate exposure response function of each two nutrients in depression.
